# Supplementary material
Source: publisher site journal article supplement (https://www.dovepress.com/article/412657)
Supplement: Supplementary file 1 [file get_supplementary_file.php]

## Advice on individual protection

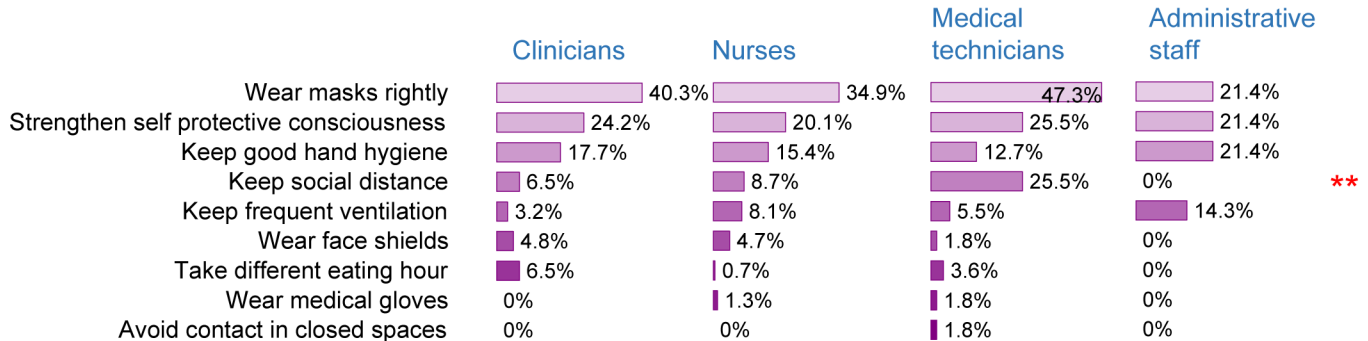

## Advice on personal life

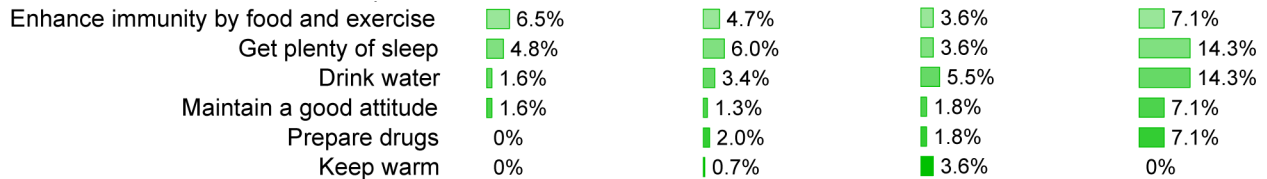

Fig. S1. Advice on individual protection and personal life against omicron wave recommended by healthcare workers from different positions. \*\*  $P < 0.01$  among four groups conducted by 2 test.
